# Supplementary material
Source: PubMed Central journal article supplement (PMC525466)
Supplement: molcellb_24_22_10000__1.pdf [file molcellb_24_22_10000__1.pdf]

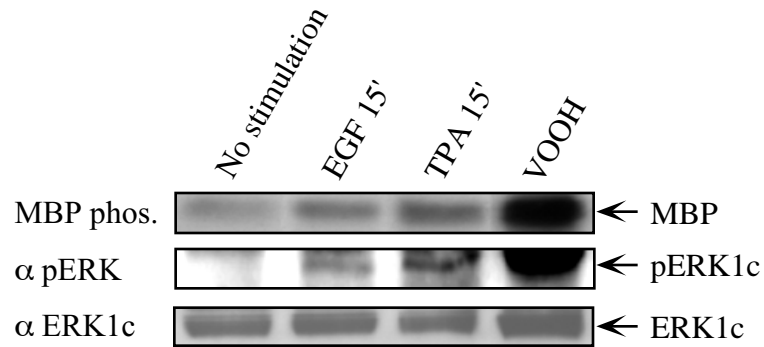

**Fig. 11. Detection of ERK1c activation by in-vitro kinase assay and anti pERK Ab:** Serum-starved HeLa cells were stimulated with EGF (50 ng/ml), TPA, (250 nM) or VOOH (100  $\mu$ M vanadate and 200  $\mu$ M H<sub>2</sub>O<sub>2</sub>). The cells were then lysed and ERK1c was immunoprecipitated using the anti ERK1c Ab. Activity of the immunoprecipitated ERK1c was determined by in-vitro kinase assay against MBP (upper panel). Level of ERK1c phosphorylation was determined with anti-pERK Ab (middle panel). Amount of immunoprecipitated ERK1c was detected by immunoblot with the anti ERK1c Ab (lower panel).

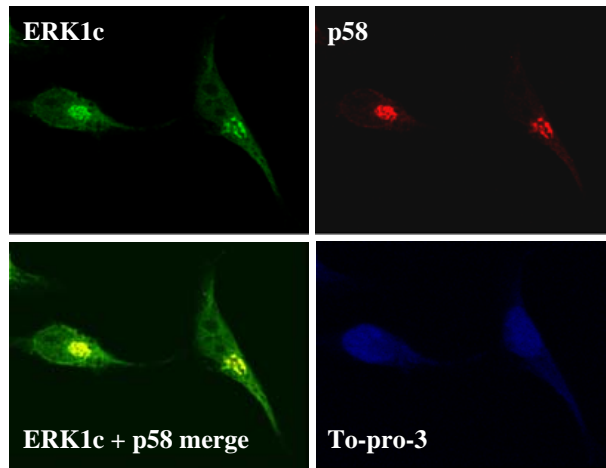

**Fig. 12. Golgi localization of ERK1c (1):** HeLa cells were stained with anti ERK1c and anti p58 Abs and with To-Pro-3 (nuclear marker). The slides were visualized by a confocal microscope.

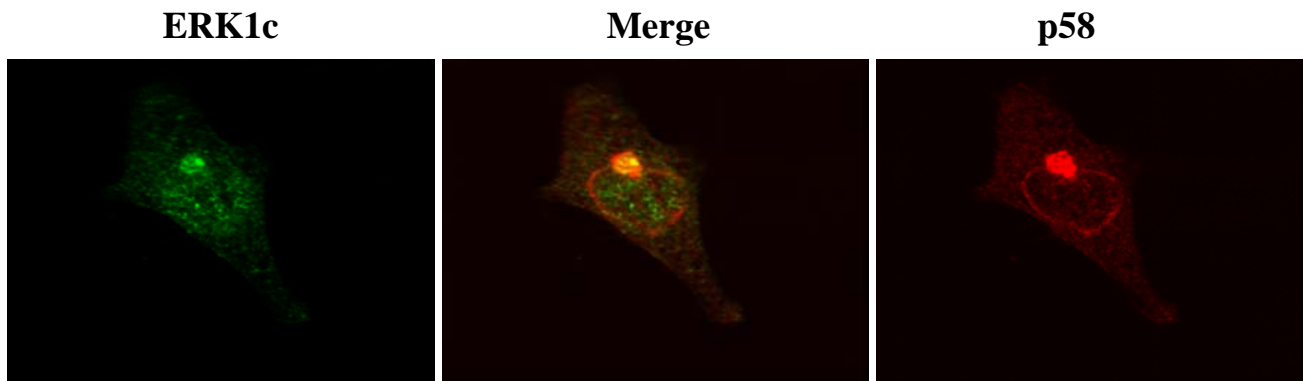

**Fig. 13. Golgi localization of ERK1c (2):** HeLa cells were stained with anti ERK1c and anti p58 Abs . The slides were visualized by a confocal microscope.

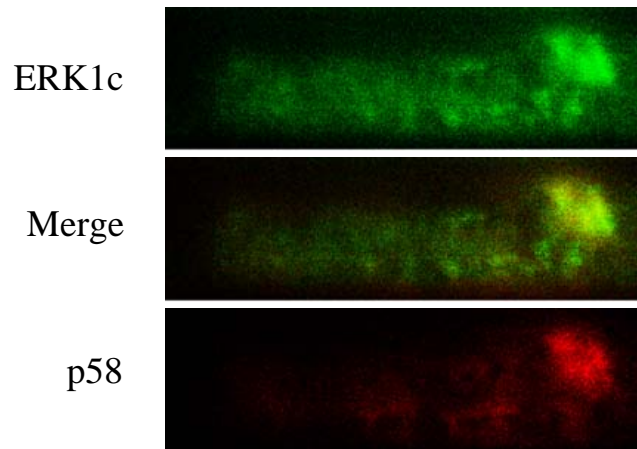

**Fig. 14. Golgi localization of ERK1c (3):** HeLa cells were stained with anti ERK1c and anti p58 Abs. The slides were visualized by a confocal microscope and the Z axis is presented.

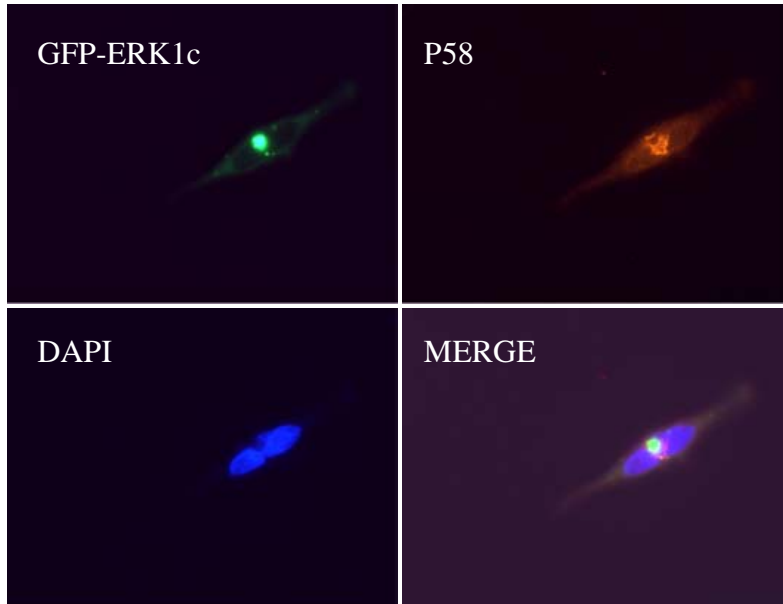

**Fig. 15. Golgi localization of overexpressed ERK1c (1):** HeLa cells transfected with GFP-ERK1c were stained with anti p58 Ab and with To-Pro-3 (nuclear marker). The slides were visualized by a confocal microscope.
